# Supplementary material for: Time trends in emotional well-being and self-esteem in children and adolescents during the COVID-19 pandemic
Source: PubMed Central journal article supplement (PMC9685852; doi:10.1186/s13034-022-00525-3), 2022-11-23
Supplement: 13034_2022_525_MOESM1_ESM.pdf [file 13034_2022_525_MOESM1_ESM.pdf]

**Time trends in emotional well-being and self-esteem in children and adolescents during the COVID-19 pandemic**

**Supplemental Material**

*Figure S1. Sample selection procedure.* ..... 2

*Table S1. Sociodemographic characteristics.* ..... 3

*Table S2. Weighted adjusted estimates of emotional well-being and self-esteem, excluding three municipalities participating in wave 3.* ..... 4

*Table S3. Weighted adjusted estimates of emotional well-being and self-esteem, excluding participants who reported having answered previous surveys (information only available in wave 3).* ..... 5

*Table S4. Weighted adjusted estimates and differences in emotional well-being and self-esteem, stratified by age (Figure 2).* ..... 6

*Table S5. Weighted adjusted estimates and differences in emotional well-being and self-esteem stratified by gender (Figure 2).* ..... 7

*Table S6. Associations between the Stringency Index and mental health outcomes and coefficients of multiplicative interaction terms between the Stringency Index and age group and gender.* ..... 8

Figure S1. Sample selection procedure.

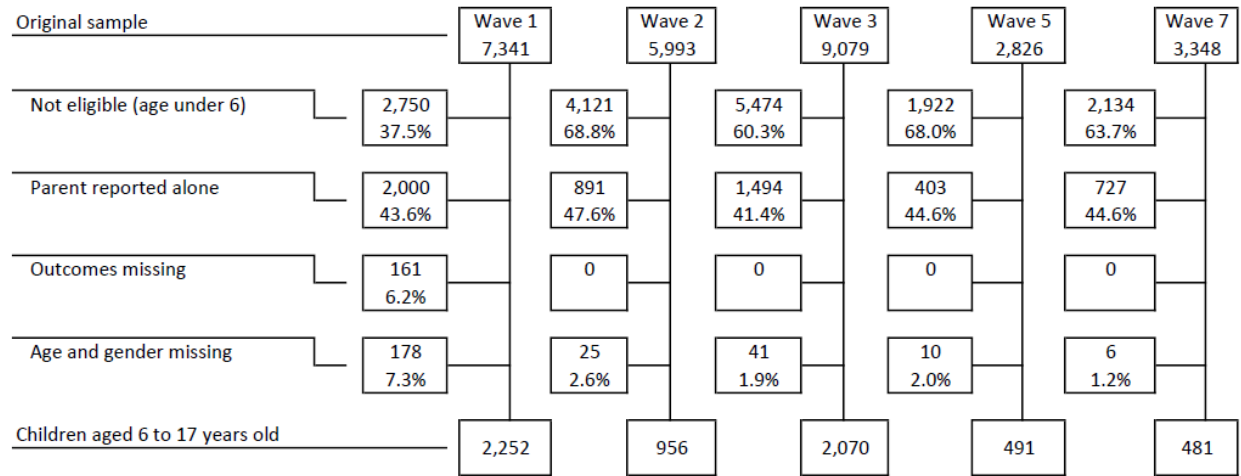

Table S1. Sociodemographic characteristics.

|                                               | Wave 1<br>N= 2,252 |      | Wave 2<br>N= 956 |      | Wave 3<br>N= 2,070 |      | Wave 5<br>N= 491 |      | Wave 7<br>N= 481 |      |
|-----------------------------------------------|--------------------|------|------------------|------|--------------------|------|------------------|------|------------------|------|
| Who the child lives with                      |                    |      |                  |      |                    |      |                  |      |                  |      |
|                                               | n                  | %    | n                | %    | n                  | %    | n                | %    | n                | %    |
| Living with both parents                      | 1966               | 87.3 |                  |      |                    |      | 406              | 82.7 | 399              | 83.0 |
| Living with one parent/others                 | 273                | 12.1 |                  |      |                    |      | 80               | 16.3 | 82               | 17.0 |
| Siblings                                      |                    |      |                  |      |                    |      |                  |      |                  |      |
| No                                            | 637                | 28.3 |                  |      |                    |      | 169              | 34.4 | 151              | 31.4 |
| Yes                                           | 1610               | 71.5 |                  |      |                    |      | 318              | 64.8 | 330              | 68.6 |
| Subjective Household Financial Status*        |                    |      |                  |      |                    |      |                  |      |                  |      |
|                                               | n                  | %    | n                | %    | n                  | %    | n                | %    | n                | %    |
| Okay                                          |                    |      | 766              | 80.1 | 1525               | 73.7 | 361              | 73.5 | 379              | 78.8 |
| Somewhat/very difficult                       |                    |      | 164              | 17.2 | 482                | 23.3 | 116              | 23.6 | 97               | 20.2 |
| Subjective financial status compared to 2020* |                    |      |                  |      |                    |      |                  |      |                  |      |
|                                               | Mean               | SD   | Mean             | SD   | Mean               | SD   | Mean             | SD   | Mean             | SD   |
| Better now                                    | 38                 | 3.3  | 39               | 4.1  | 90                 | 4.3  | 22               | 4.5  | 27               | 5.6  |
| Same                                          | 829                | 71.6 | 685              | 71.7 | 1380               | 66.7 | 317              | 64.6 | 342              | 71.1 |
| Worse now                                     | 274                | 23.7 | 202              | 21.1 | 491                | 23.7 | 124              | 25.3 | 103              | 21.4 |

\*Not asked when child participated alone in wave 1

Table S2. Weighted adjusted estimates of emotional well-being and self-esteem, excluding three municipalities participating in wave 3.

|                      | N     | Estimate<br>[95%CI]  | Difference<br>[95% CI]       |                               |                               |                              |
|----------------------|-------|----------------------|------------------------------|-------------------------------|-------------------------------|------------------------------|
| Emotional well-being |       |                      |                              |                               |                               |                              |
| May 2020             | 2,252 | 71.6<br>[70.7, 72.5] | reference                    |                               |                               |                              |
| July 2020            | 956   | 72.5<br>[70.9, 74.1] | 0.9 [-0.9, 2.7],<br>p=0.350  | reference                     |                               |                              |
| Sep/Oct 2020         | 1,545 | 73.9<br>[72.7, 75.0] | 2.2 [0.8, 3.7],<br>p=0.003   | 1.4 [-0.6, 3.3],<br>p=0.168   | reference                     |                              |
| March 2021           | 491   | 70.6<br>[68.4, 72.8] | -1.0 [-3.4, 1.3],<br>p=0.401 | -1.9 [-4.6, 0.8],<br>p=0.170  | -3.2 [-5.7, -0.8],<br>p=0.010 | reference                    |
| December 2021        | 481   | 70.3<br>[68.3, 72.2] | -1.4 [-3.5, 0.8],<br>p=0.213 | -2.2 [-4.7, 0.3],<br>p=0.080  | -3.6 [-5.9, -1.3],<br>p=0.002 | -0.4 [-3.3, 2.6],<br>p=0.813 |
| Self-esteem          |       |                      |                              |                               |                               |                              |
| May 2020             | 2,252 | 52.5<br>[51.3, 53.7] | reference                    |                               |                               |                              |
| July 2020            | 956   | 57.5<br>[55.7, 59.4] | 5.0 [2.8, 7.3],<br>p<0.001   | reference                     |                               |                              |
| Sep/Oct 2020         | 1,545 | 53.5<br>[52.1, 54.9] | 1.0 [-0.9, 2.9],<br>p=0.289  | -4.0 [-6.4, -1.7],<br>p=0.001 | reference                     |                              |
| March 2021           | 491   | 52.8<br>[50.2, 55.5] | 0.3 [-2.6, 3.2],<br>p=0.831  | -4.7 [-8.0, -1.5],<br>p=0.004 | -0.7 [-3.7, 2.3],<br>p=0.649  | reference                    |
| December 2021        | 481   | 57.2<br>[54.9, 59.4] | 4.7 [2.1, 7.3],<br>p<0.001   | -0.3 [-3.3, 2.6],<br>p=0.821  | 3.7 [1.0, 6.3],<br>p=0.007    | 4.4 [0.9, 7.9],<br>p=0.014   |

Table S3. Weighted adjusted estimates of emotional well-being and self-esteem, excluding participants who reported having answered previous surveys (information only available in wave 3).

|                             | N     | Estimate<br>[95%CI]  | Difference<br>[95% CI]       |                               |                               |                              |
|-----------------------------|-------|----------------------|------------------------------|-------------------------------|-------------------------------|------------------------------|
| <b>Emotional well-being</b> |       |                      |                              |                               |                               |                              |
| May 2020                    | 2,252 | 71.6<br>[70.7, 72.5] | reference                    |                               |                               |                              |
| July 2020                   | 956   | 72.5<br>[70.9, 74.0] | 0.9 [-0.9, 2.7],<br>p=0.350  | reference                     |                               |                              |
| Sep/Oct 2020                | 1,691 | 72.7<br>[71.5, 73.8] | 1.1 [-0.4, 2.5],<br>p=0.156  | 0.2 [-1.7, 2.1],<br>p=0.843   | reference                     |                              |
| March 2021                  | 491   | 70.6<br>[68.4, 72.8] | -1.0 [-3.4, 1.3],<br>p=0.402 | -1.9 [-4.6, 0.8],<br>p=0.171  | -2.1 [-4.5, 0.4],<br>p=0.099  | reference                    |
| December 2021               | 481   | 70.2<br>[68.3, 72.2] | -1.4 [-3.5, 0.8],<br>p=0.213 | -2.2 [-4.7, 0.3],<br>p=0.080  | -2.4 [-4.7, -0.2],<br>p=0.035 | -0.4 [-3.3, 2.6],<br>p=0.813 |
| <b>Self-esteem</b>          |       |                      |                              |                               |                               |                              |
| May 2020                    | 2,252 | 52.5<br>[51.3, 53.7] | reference                    |                               |                               |                              |
| July 2020                   | 956   | 57.5<br>[55.7, 59.4] | 5.0 [2.8, 7.3],<br>p<0.001   | reference                     |                               |                              |
| Sep/Oct 2020                | 1,691 | 52.7<br>[51.2, 54.1] | 0.2 [-1.7, 2.1],<br>p=0.845  | -4.8 [-7.2, -2.5],<br>p<0.001 | reference                     |                              |
| March 2021                  | 491   | 52.8<br>[50.2, 55.5] | 0.3 [-2.6, 3.2],<br>p=0.831  | -4.7 [-8.0, -1.5],<br>p=0.004 | 0.1 [-2.9, 3.1],<br>p=0.933   | reference                    |
| December 2021               | 481   | 57.2<br>[54.9, 59.4] | 4.7 [2.1, 7.3],<br>p<0.001   | -0.3 [-3.3, 2.6],<br>p=0.821  | 4.5 [1.8, 7.2],<br>p=0.001    | 4.4 [0.9, 7.9],<br>p=0.014   |

Table S4. Weighted adjusted estimates and differences in emotional well-being and self-esteem, stratified by age (Figure 2).

|                      | Estimate<br>[95%CI]  | Difference<br>[95% CI]        |                               |                               |                              |
|----------------------|----------------------|-------------------------------|-------------------------------|-------------------------------|------------------------------|
| Emotional well-being |                      |                               |                               |                               |                              |
| 6-11                 |                      |                               |                               |                               |                              |
| May 2020             | 73.8<br>[72.9, 74.7] | reference                     |                               |                               |                              |
| July 2020            | 74.9<br>[73.5, 76.3] | 1.1 [-0.6, 2.7],<br>p=0.194   | reference                     |                               |                              |
| Sep/Oct 2020         | 77.3<br>[76.4, 78.2] | 3.4 [2.2, 4.7],<br>p<0.001    | 2.4 [0.7, 4.0],<br>p=0.004    | reference                     |                              |
| March 2021           | 75.4<br>[73.2, 77.5] | 1.6 [-0.8, 3.9],<br>p=0.188   | 0.5 [-2.1, 3.0],<br>p=0.715   | -1.9 [-4.2, 0.4],<br>p=0.110  | reference                    |
| December 2021        | 75.2<br>[73.1, 77.2] | 1.3 [-0.9, 3.6],<br>p=0.248   | 0.2 [-2.2, 2.7],<br>p=0.845   | -2.1 [-4.4, 0.1],<br>p=0.067  | -0.2 [-3.2, 2.7],<br>p=0.882 |
| 12-17                |                      |                               |                               |                               |                              |
| May 2020             | 69.6<br>[68.0, 71.1] | reference                     |                               |                               |                              |
| July 2020            | 70.2<br>[67.5, 73.0] | 0.7 [-2.5, 3.8],<br>p=0.683   | reference                     |                               |                              |
| Sep/Oct 2020         | 69.7<br>[67.9, 71.6] | 0.2 [-2.2, 2.6],<br>p=0.883   | -0.5 [-3.8, 2.8],<br>p=0.778  | reference                     |                              |
| March 2021           | 66.1<br>[62.5, 69.7] | -3.5 [-7.4, 0.5],<br>p=0.086  | -4.1 [-8.7, 0.5],<br>p=0.078  | -3.6 [-7.7, 0.4],<br>p=0.081  | reference                    |
| December 2021        | 65.6<br>[62.4, 68.8] | -3.9 [-7.5, -0.4],<br>p=0.030 | -4.6 [-8.8, -0.4],<br>p=0.033 | -4.1 [-7.8, -0.4],<br>p=0.029 | -0.5 [-5.3, 4.4],<br>p=0.848 |
| Self-esteem          |                      |                               |                               |                               |                              |
| 6-11                 |                      |                               |                               |                               |                              |
| May 2020             | 57.8<br>[56.5, 59.1] | reference                     |                               |                               |                              |
| July 2020            | 64.5<br>[62.8, 66.3] | 6.8 [4.6, 8.9],<br>p<0.001    | reference                     |                               |                              |
| Sep/Oct 2020         | 61.1<br>[59.9, 62.3] | 3.3 [1.6, 5.1],<br>p<0.001    | -3.4 [-5.5, -1.3],<br>p=0.002 | reference                     |                              |
| March 2021           | 59.8<br>[57.0, 62.5] | 2.0 [-1.0, 5.0],<br>p=0.199   | -4.8 [-8.0, -1.5],<br>p=0.004 | -1.4 [-4.4, 1.6],<br>p=0.370  | reference                    |
| December 2021        | 65.1<br>[62.6, 67.6] | 7.4 [4.6, 10.2],<br>p<0.001   | 0.6 [-2.4, 3.6],<br>p=0.699   | 4.0 [1.3, 6.8],<br>p=0.004    | 5.4 [1.7, 9.1],<br>p=0.004   |
| 12-17                |                      |                               |                               |                               |                              |
| May 2020             | 47.5<br>[45.5, 49.4] | reference                     |                               |                               |                              |
| July 2020            | 50.9<br>[47.7, 54.0] | 3.4 [-0.3, 7.1],<br>p=0.072   | reference                     |                               |                              |
| Sep/Oct 2020         | 45.9<br>[43.7, 48.1] | -1.5 [-4.5, 1.4],<br>p=0.306  | -4.9 [-8.8, -1.1],<br>p=0.012 | reference                     |                              |
| March 2021           | 46.2<br>[42.0, 50.4] | -1.3 [-5.9, 3.4],<br>p=0.594  | -4.7 [-9.9, 0.6],<br>p=0.082  | 0.3 [-4.5, 5.0],<br>p=0.912   | reference                    |
| December 2021        | 49.6<br>[46.1, 53.2] | 2.2 [-1.9, 6.2],<br>p=0.292   | -1.2 [-6.0, 3.5],<br>p=0.612  | 3.7 [-0.5, 7.9],<br>p=0.082   | 3.4 [-2.1, 8.9],<br>p=0.221  |

Table S5. Weighted adjusted estimates and differences in emotional well-being and self-esteem stratified by gender (Figure 2).

|                      | Estimate<br>[95%CI]  | Difference<br>[95% CI]       |                               |                               |                              |
|----------------------|----------------------|------------------------------|-------------------------------|-------------------------------|------------------------------|
| Emotional well-being |                      |                              |                               |                               |                              |
| Male                 |                      |                              |                               |                               |                              |
| May 2020             | 72.7<br>[71.4, 74.0] | reference                    |                               |                               |                              |
| July 2020            | 72.4<br>[70.4, 74.5] | -0.3 [-2.7, 2.1],<br>p=0.822 | reference                     |                               |                              |
| Sep/Oct 2020         | 73.5<br>[72.1, 74.9] | 0.8 [-1.2, 2.7],<br>p=0.441  | 1.0 [-1.4, 3.5],<br>p=0.413   | reference                     |                              |
| March 2021           | 70.4<br>[67.2, 73.5] | -2.4 [-5.8, 1.1],<br>p=0.175 | -2.1 [-5.8, 1.7],<br>p=0.277  | -3.1 [-6.6, 0.3],<br>p=0.077  | reference                    |
| December 2021        | 69.9<br>[67.3, 72.5] | -2.9 [-5.8, 0.0],<br>p=0.054 | -2.6 [-5.9, 0.7],<br>p=0.125  | -3.6 [-6.6, -0.7],<br>p=0.016 | -0.5 [-4.6, 3.6],<br>p=0.811 |
| Female               |                      |                              |                               |                               |                              |
| May 2020             | 70.5<br>[69.4, 71.6] | reference                    |                               |                               |                              |
| July 2020            | 72.5<br>[70.6, 74.5] | 2.1 [-0.2, 4.3],<br>p=0.071  | reference                     |                               |                              |
| Sep/Oct 2020         | 73.3<br>[72.1, 74.6] | 2.8 [1.2, 4.5],<br>p=0.001   | 0.8 [-1.6, 3.1],<br>p=0.518   | reference                     |                              |
| March 2021           | 70.9<br>[68.4, 73.4] | 0.4 [-2.3, 3.2],<br>p=0.772  | -1.7 [-4.9, 1.5],<br>p=0.310  | -2.4 [-5.2, 0.4],<br>p=0.091  | reference                    |
| December 2021        | 70.7<br>[68.1, 73.3] | 0.2 [-2.6, 3.0],<br>p=0.886  | -1.9 [-5.1, 1.4],<br>p=0.268  | -2.6 [-5.5, 0.3],<br>p=0.077  | -0.2 [-3.8, 3.5],<br>p=0.915 |
| Self-esteem          |                      |                              |                               |                               |                              |
| Male                 |                      |                              |                               |                               |                              |
| May 2020             | 54.0<br>[52.3, 55.7] | reference                    |                               |                               |                              |
| July 2020            | 56.9<br>[54.5, 59.3] | 2.9 [-0.1, 5.9],<br>p=0.055  | reference                     |                               |                              |
| Sep/Oct 2020         | 54.9<br>[53.2, 56.7] | 0.9 [-1.5, 3.4],<br>p=0.451  | -2.0 [-4.9, 1.0],<br>p=0.194  | reference                     |                              |
| March 2021           | 53.3<br>[49.6, 57.0] | -0.7 [-4.8, 3.4],<br>p=0.743 | -3.6 [-8.0, 0.8],<br>p=0.110  | -1.6 [-5.7, 2.4],<br>p=0.434  | reference                    |
| December 2021        | 57.6<br>[54.7, 60.5] | 3.6 [0.2, 7.0],<br>p=0.039   | 0.7 [-3.1, 4.5],<br>p=0.724   | 2.7 [-0.8, 6.1],<br>p=0.127   | 4.3 [-0.4, 9.0],<br>p=0.075  |
| Female               |                      |                              |                               |                               |                              |
| May 2020             | 50.9<br>[49.5, 52.3] | reference                    |                               |                               |                              |
| July 2020            | 58.2<br>[55.9, 60.5] | 7.3 [4.6, 10.0],<br>p<0.001  | reference                     |                               |                              |
| Sep/Oct 2020         | 51.6<br>[50.2, 53.1] | 0.7 [-1.3, 2.8],<br>p=0.475  | -6.5 [-9.3, -3.8],<br>p<0.001 | reference                     |                              |
| March 2021           | 52.3<br>[49.2, 55.3] | 1.4 [-2.0, 4.7],<br>p=0.428  | -5.9 [-9.7, -2.1],<br>p=0.003 | 0.6 [-2.8, 4.0],<br>p=0.719   | reference                    |
| December 2021        | 56.8<br>[53.8, 59.8] | 5.9 [2.6, 9.2],<br>p=0.001   | -1.4 [-5.2, 2.4],<br>p=0.463  | 5.1 [1.8, 8.4],<br>p=0.003    | 4.5 [0.2, 8.8],<br>p=0.040   |

Table S6. Associations between the Stringency Index and mental health outcomes and coefficients of multiplicative interaction terms between the Stringency Index and age group and gender.

|                             | Coefficient | 95%CI |       | p-value |
|-----------------------------|-------------|-------|-------|---------|
| <b>Emotional well-being</b> |             |       |       |         |
| Overall                     | -1.30       | -2.55 | -0.05 | 0.041   |
| <b>Child Age</b>            |             |       |       |         |
| 6-11                        | -1.26       | -2.81 | 0.29  | 0.111   |
| 12-17                       | -1.44       | -3.01 | 0.13  | 0.072   |
| Interaction                 | 0.18        | -1.94 | 2.30  | 0.866   |
| <b>Gender</b>               |             |       |       |         |
| Female                      | -1.67       | -3.11 | -0.24 | 0.022   |
| Male                        | -0.77       | -2.06 | 0.52  | 0.241   |
| Interaction                 | -0.60       | -1.81 | 0.60  | 0.324   |
| 6-11/Female                 | -1.62       | -3.61 | 0.36  | 0.109   |
| 6-11/Male                   | -0.74       | -1.98 | 0.51  | 0.245   |
| 12-17/Female                | -1.84       | -3.49 | -0.19 | 0.029   |
| 12-17/Male                  | -0.87       | -2.86 | 1.11  | 0.389   |
| <b>Self-esteem</b>          |             |       |       |         |
| Overall                     | -1.29       | -3.32 | 0.74  | 0.212   |
| <b>Child Age</b>            |             |       |       |         |
| 6-11                        | -1.92       | -4.04 | 0.20  | 0.076   |
| 12-17                       | 0.52        | -1.88 | 2.93  | 0.671   |
| Interaction                 | -2.44       | -4.49 | -0.39 | 0.020   |
| <b>Gender</b>               |             |       |       |         |
| Female                      | -1.68       | -4.49 | 1.14  | 0.243   |
| Male                        | -0.76       | -1.73 | 0.20  | 0.122   |
| Interaction                 | -0.60       | -1.34 | 0.15  | 0.118   |
| 6-11/Female                 | -2.42       | -5.06 | 0.21  | 0.072   |
| 6-11/Male                   | -1.19       | -2.62 | 0.24  | 0.104   |
| 12-17/Female                | 0.54        | -3.61 | 4.70  | 0.798   |
| 12-17/Male                  | 0.49        | -0.27 | 1.26  | 0.209   |

The coefficients were calculated for 10-unit increases in the Stringency Index, for the full sample and stratified by age group and gender (Figure 3).
